# Supplementary material
Source: PubMed Central journal article supplement (PMC3367525)
Supplement: cr201240x1.pdf [file cr201240x1.pdf]

## Supplementary information, Figure S1

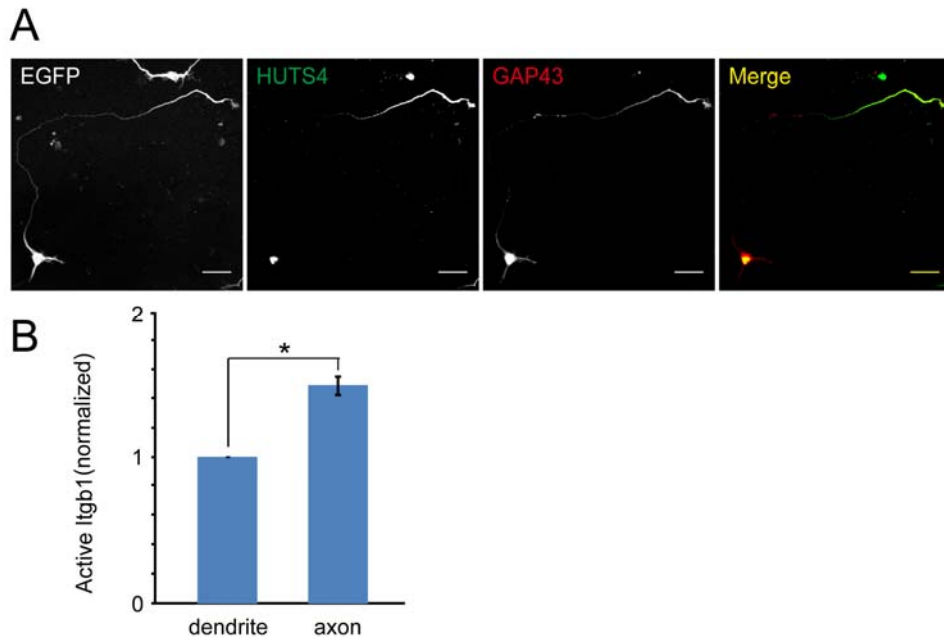

**Figure S1** Polarized activation of Itgb1 in cultured hippocampal neurons. **(A)** Rat hippocampal neurons transfected with EGFP were cultured on laminin substrates for 48 h, followed by staining with antibodies against active form of Itgb1 (HUTS-4, red) and axonal marker GAP43 (blue). Scale bar, 20  $\mu$ m. **(B)** Relative immunofluorescence intensity of HUTS-4 in axons versus in dendrites. The intensity of EGFP was used to normalize the neurite volume. Data are shown as mean  $\pm$  SEM ( $n = 42$  for dendrite,  $n = 31$  for axon), with the average value of dendrites normalized as 1.0.  $*P < 0.05$ .
