# Supplementary material
Source: PubMed Central journal article supplement (PMC3367525)
Supplement: cr201240x2.pdf [file cr201240x2.pdf]

## Supplementary information, Figure S2

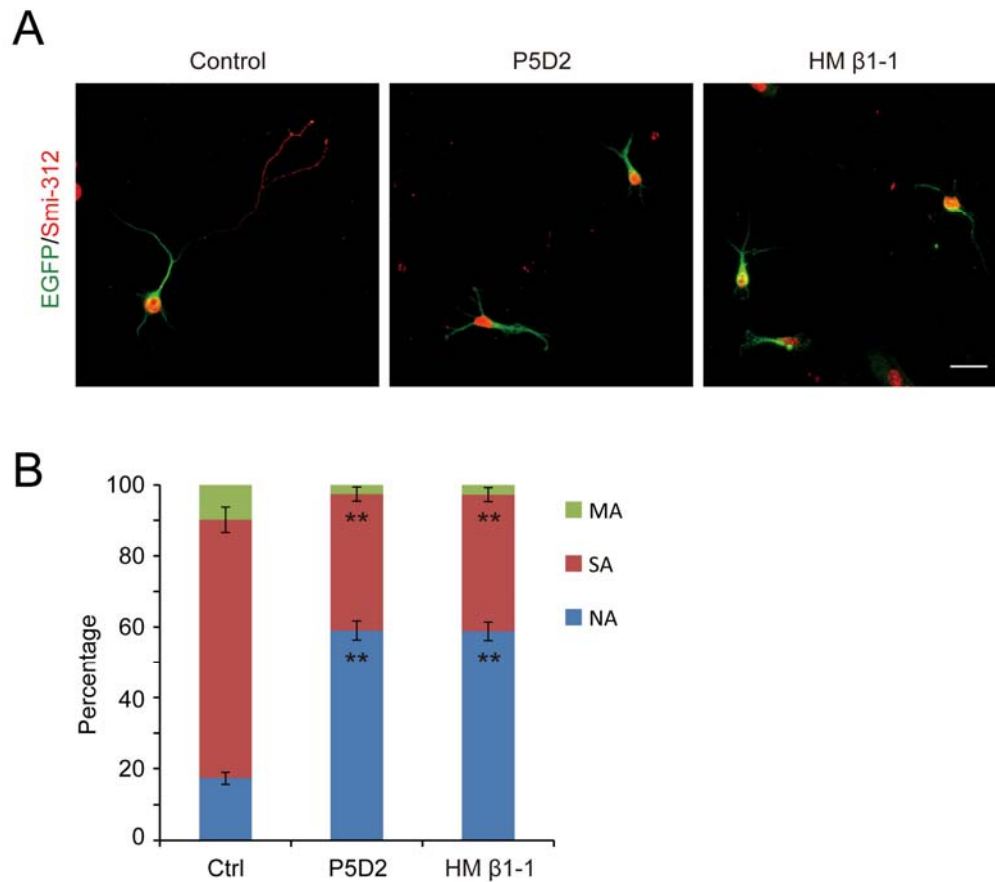

**Figure S2** Effects of *Itgb1* function-blocking antibodies on axon development in cultured hippocampal neurons. **(A)** Dissociated hippocampal neurons were first transfected with pCAG-EGFP and plated on laminin substrates, followed by treatment with function-blocking antibodies P5D2 (2  $\mu$ g/ml) or HM  $\beta$ 1-1 (10  $\mu$ g/ml) at DIV1. Transfected neurons were marked by EGFP and stained with axonal marker Smi-312. Scale bar, 20  $\mu$ m. **(B)** Quantification for neuronal polarity. Data are presented as mean  $\pm$  SEM of 150 neurons from three experiments. \*\* $P < 0.01$ .
