# Supplementary material
Source: PubMed Central journal article supplement (PMC3367525)
Supplement: cr201240x3.pdf [file cr201240x3.pdf]

## Supplementary information, Figure S3

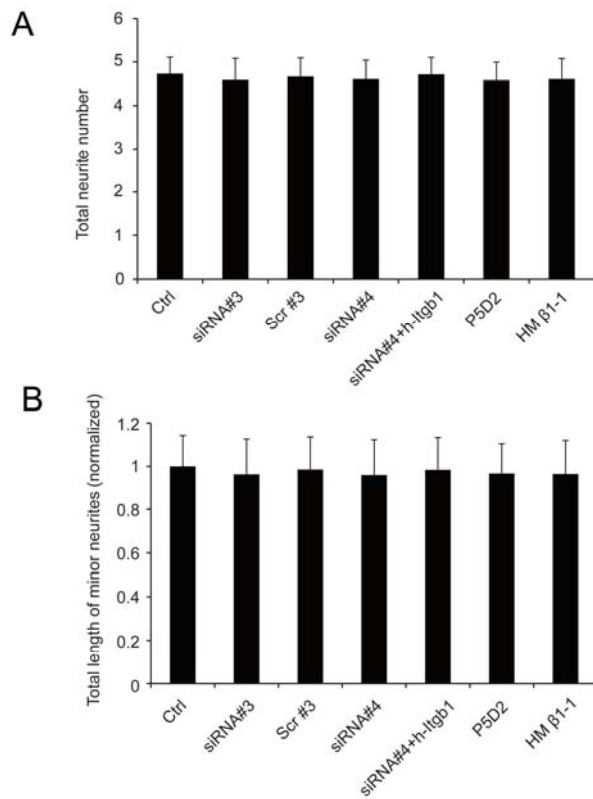

**Figure S3** Itgb1 is dispensable for the growth of minor neurites. **(A, B)** Hippocampal neurons were transfected with indicated constructs or treated with function-blocking antibodies against Itgb1. Total neurite number **(A)** and total length of minor neurites **(B)** were quantified. Cells were plated on laminin substrates. Data are shown as mean  $\pm$  SEM of 150 neurons from three experiments. Total length of minor neurites from control group was normalized as 1.0.
