# Supplementary material
Source: PubMed Central journal article supplement (PMC3367525)
Supplement: cr201240x4.pdf [file cr201240x4.pdf]

## Supplementary information, Figure S4

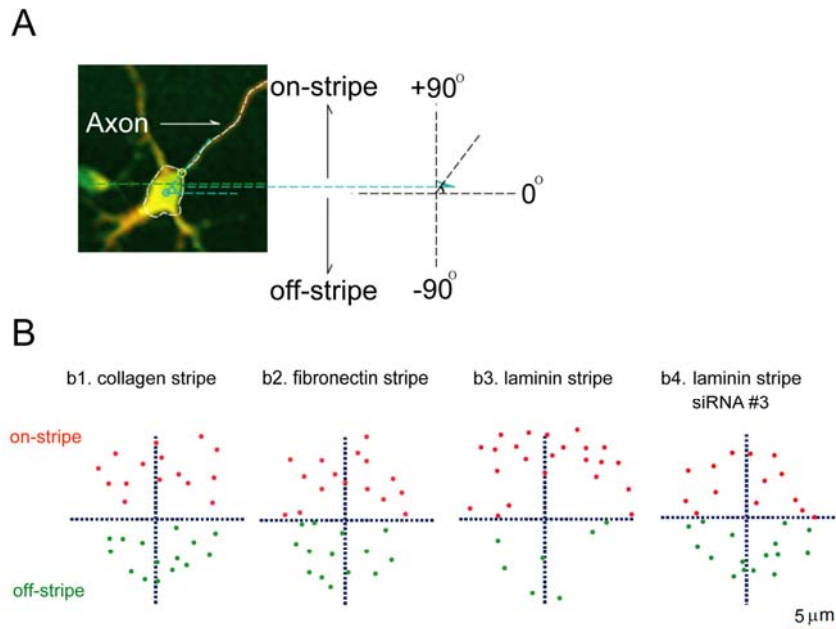

**Figure S4** Definition and angular distribution of axon-initiation sites. **(A)** Axon initiation sites were analyzed by measuring the angles between strip boundary and the line linking axon initiation site and center of the soma ( $0$  to  $+90^\circ$ , on-stripe;  $-90$  to  $0^\circ$ , off-stripe). **(B)** Shown are angular distribution of axon-initiation sites for cells cultured on stripes of laminin, fibronectin or collagen, with red dots indicating on-stripe axon initiation sites and green dots indicating off-stripe axon initiation sites, respectively. 30 random sampled cells were analyzed for each group. Scale bar,  $5 \mu\text{m}$ .
