# Supplementary material
Source: PubMed Central journal article supplement (PMC3367525)
Supplement: cr201240x5.pdf [file cr201240x5.pdf]

## Supplementary information, Figure S5

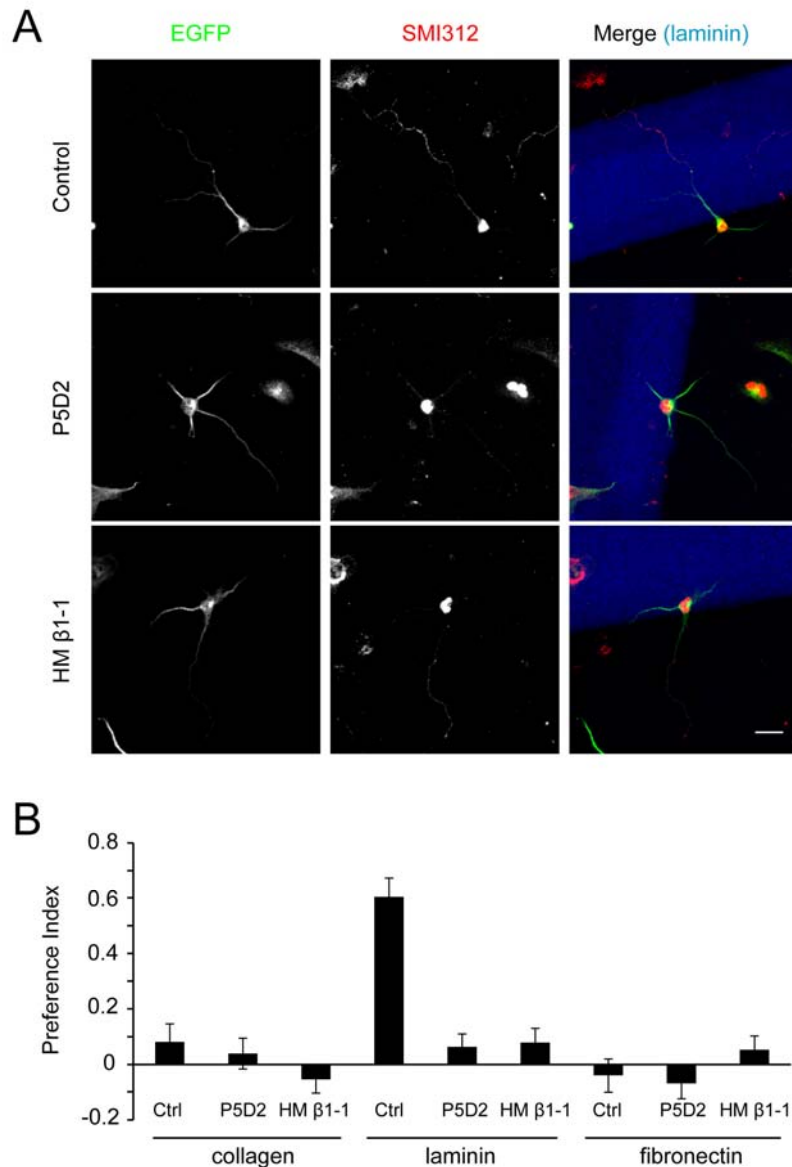

**Figure S5** Effects of Itgb1 function-blocking antibodies on axon initiation on laminin-strips. **(A)** Hippocampal neurons were transfected with pCAG-EGFP and cultured on substrates coated with laminin stripes (blue) and PDL, followed by the treatments with P5D2, HM  $\beta$ 1-1 or vehicle control (DMSO). After 48 h, cultures were stained with Smi-312 antibody. Scale bar, 20  $\mu$ m. **(B)** Preference index (PI, defined as  $[(\% \text{ on stripe}) - (\% \text{ off stripe})] / 100\%$ ) was analyzed to reflect the preference of axon initiation sites to different substrates for neurons without (Ctrl) or with Itgb1 blocking antibodies.
