# Supplementary material
Source: PubMed Central journal article supplement (PMC3367525)
Supplement: cr201240x6.pdf [file cr201240x6.pdf]

## Supplementary information, Figure S6

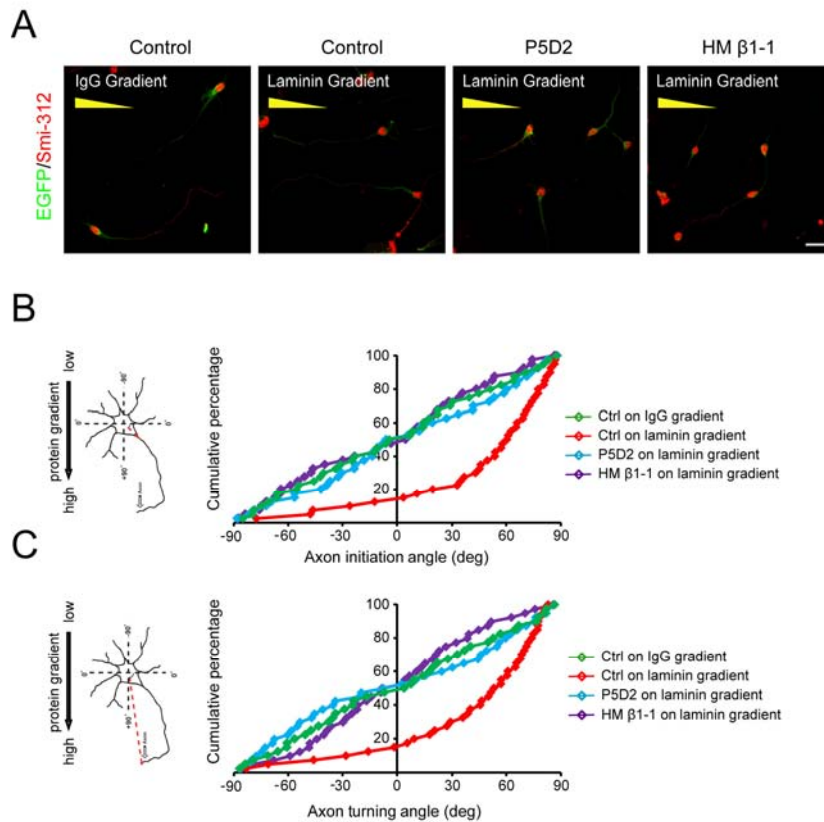

**Figure S6** Effects of Itgb1 function-blocking antibodies on axon initiation and turning on laminin gradients. **(A-C)** Isolated hippocampal neurons were first transfected with pCAG-EGFP and plated onto either IgG or laminin gradients, followed by the treatments with P5D2, HM  $\beta$ 1-1, or vehicle control. After 48 h, neurons were stained with Smi-312 antibody **(A)**. Scale bar, 20  $\mu$ m. **(B, C)** Cumulative percentage of axon initiation and turning angles for all sampled single-axon neurons was plotted. Angles with positive value ( $0^\circ$  to  $90^\circ$ ) or negative value ( $-90^\circ$  to  $0^\circ$ ) indicate that the axon was initiated or turned toward the high- and low-density side of the gradient, respectively. Data were analyzed using Kolmogorov-Smirnov test ( $P < 0.001$ , IgG gradients vs. laminin gradients;  $P < 0.001$ , Ctrl on laminin vs. P5D2 on laminin;  $P < 0.001$ , Ctrl on laminin vs. HM  $\beta$ 1-1 on laminin;  $n = 40$  for all experimental groups).
