# Supplementary material
Source: PubMed Central journal article supplement (PMC3367525)
Supplement: cr201240x7.pdf [file cr201240x7.pdf]

## Supplementary information, Figure S7

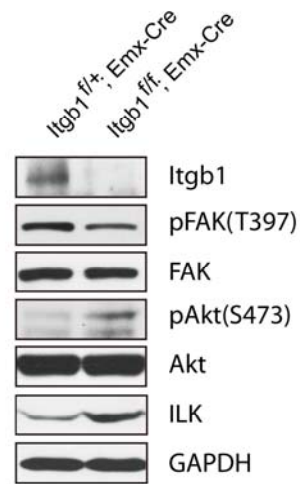

**Figure S7** Homogenates of cortex from littermate P0 mice with indicated genotypes were subject to IB with indicated antibodies. Blot shown is a representative of three sets of experiments with similar results.
