# Supplementary material
Source: PubMed Central journal article supplement (PMC3367525)
Supplement: cr201240x8.pdf [file cr201240x8.pdf]

## Supplementary information, Figure S8

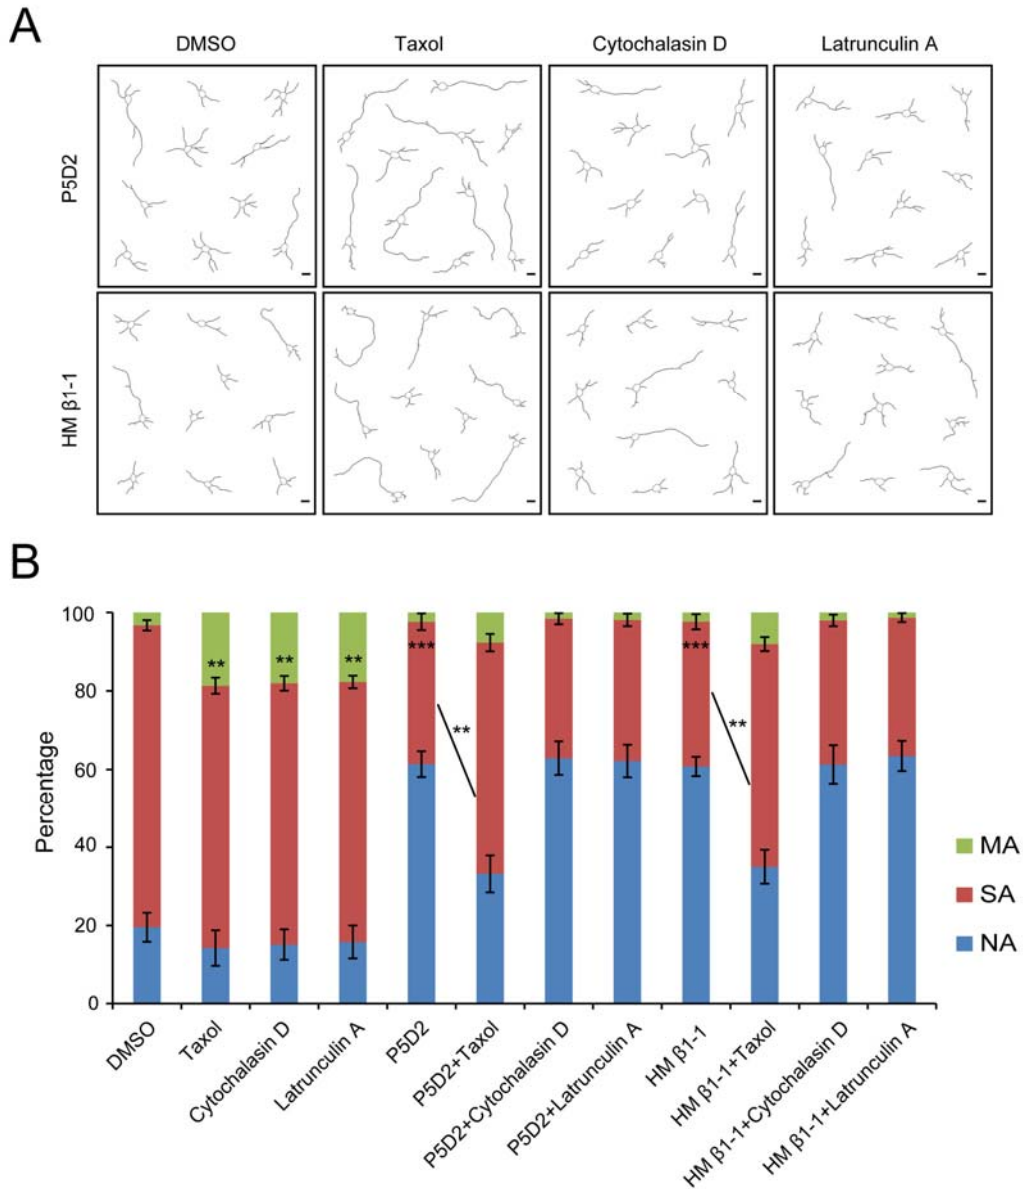

**Figure S8** Taxol stabilization of microtubules partially prevents the loss of neuronal polarity caused by Itgb1 function-blocking antibodies. **(A)** DIV1 hippocampal neurons plated on laminin substrates were treated with Itgb1 function-blocking antibodies P5D2 or HM  $\beta$ 1-1, together with cytochalasin D (1  $\mu$ M), Latrunculin A (1  $\mu$ M), or Taxol (2 nM) for 12 h. Shown are representative reconstructed images of neurons from different groups. Scale bar, 10  $\mu$ m. **(B)** Quantification for neuronal polarity. Note that P5D2 and HM  $\beta$ 1-1 treatments both decreased the percentage of neurons with single axon ( $^{***}P < 0.001$  vs. DMSO). Treatments with cytochalasin D,

latrunculin A, or Taxol all increased the percentage of neurons with multiple axons (\*\* $P < 0.01$  vs. DMSO). Taxol treatment significantly increased the percentage of neurons with single axon in neurons treated with Itgb1 blocking antibodies (\*\* $P < 0.01$ , P5D2 vs. P5D2 plus Taxol; HM  $\beta$ 1-1 vs. HM  $\beta$ 1-1 plus Taxol).
