# Supplementary material
Source: PubMed Central journal article supplement (PMC3367525)
Supplement: cr201240x9.pdf [file cr201240x9.pdf]

## Supplementary information, Figure S9

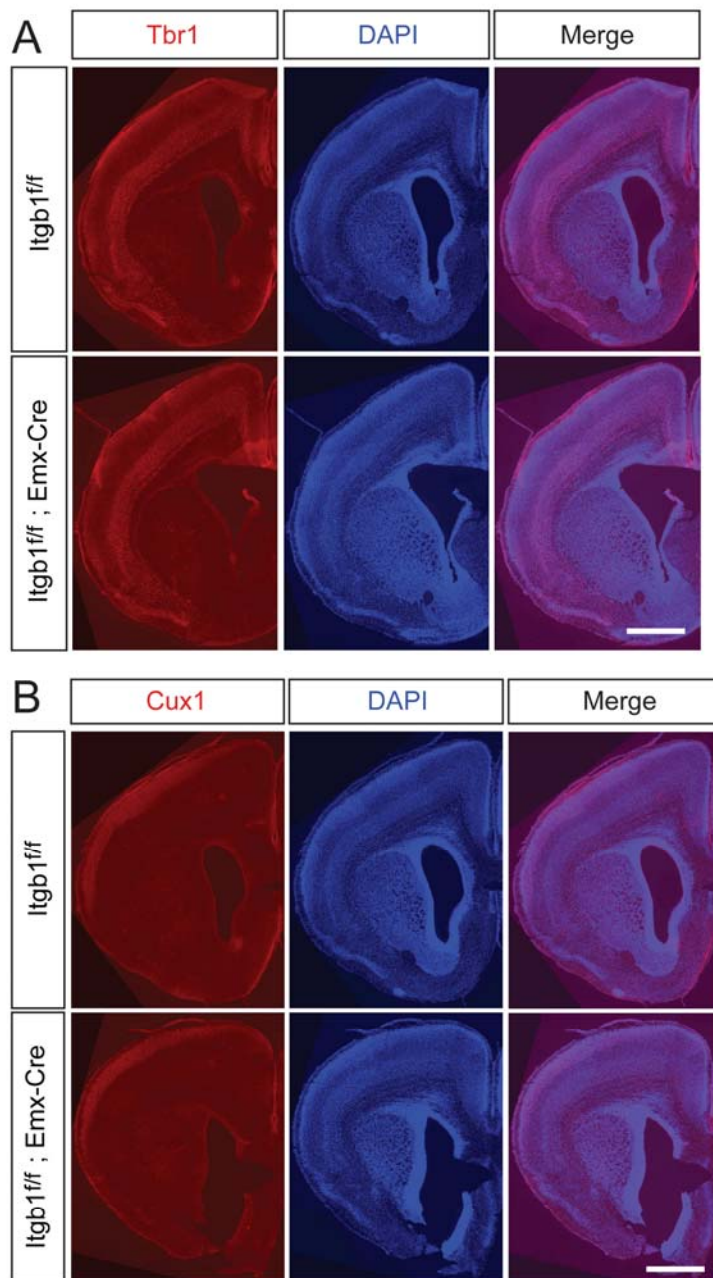

**Figure S9** Cortical sections from *Itgb1<sup>ff</sup>* or *Itgb1<sup>ff</sup>; Emx1-Cre* mice at P20 were stained with antibody against Tbr1 (**A**) to mark layers II-IV and VI, or Cux1 (**B**) to mark layers II-III. Scale bar, 1 mm.
