# Supplementary material
Source: PubMed Central journal article supplement (PMC3367525)
Supplement: cr201240x10.pdf [file cr201240x10.pdf]

## Supplementary information, Figure S10

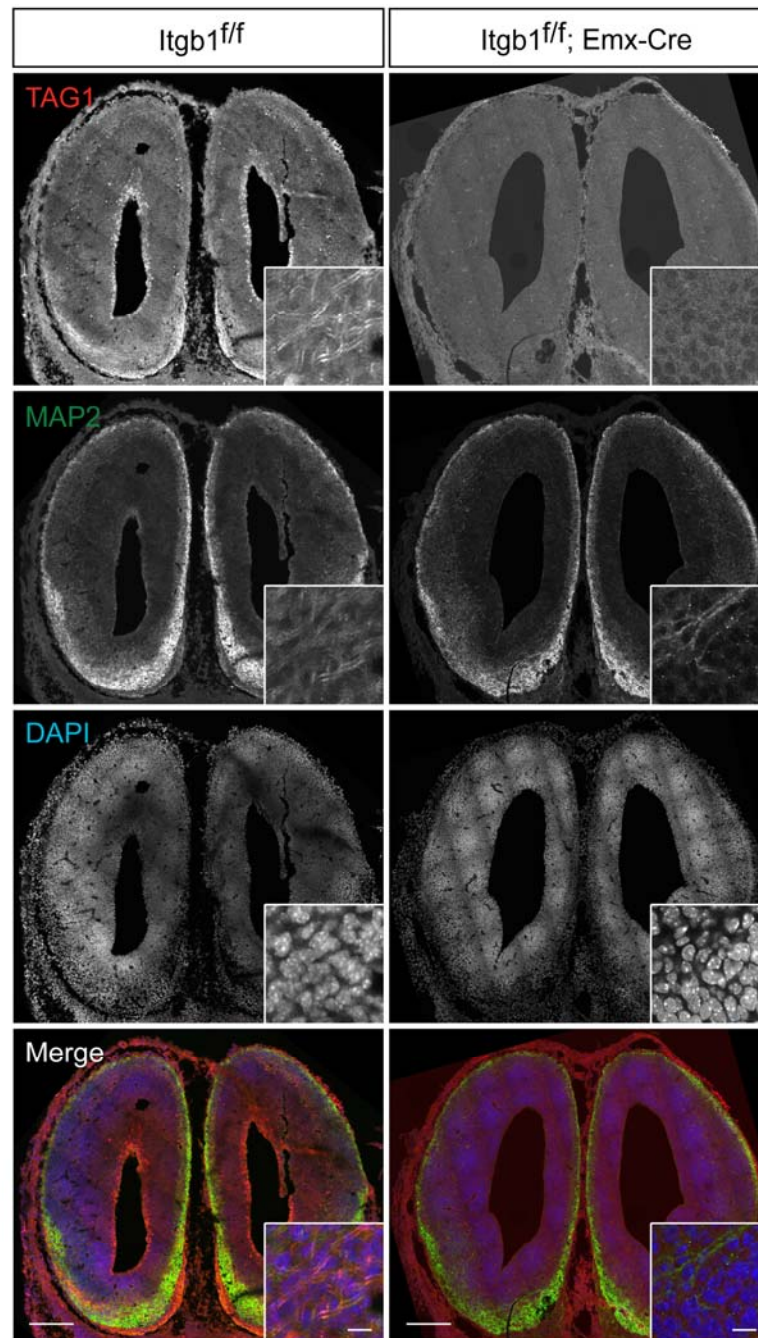

**Figure S10** Cortical sections of control (*Itgb1<sup>f/f</sup>*) or *Itgb1* mutant (*Itgb1<sup>f/f</sup>; Emx1-Cre*) mice at E14.5 were stained with antibody against TAG1 or MAP2. Cell layers were displayed by DAPI labeling. Insets indicate magnified regions indicated by arrows. Scale bars are 600  $\mu\text{m}$  or 30  $\mu\text{m}$  (insets).
