# Supplementary material
Source: PubMed Central journal article supplement (PMC3367525)
Supplement: cr201240x11.pdf [file cr201240x11.pdf]

## Supplementary information, Figure S11

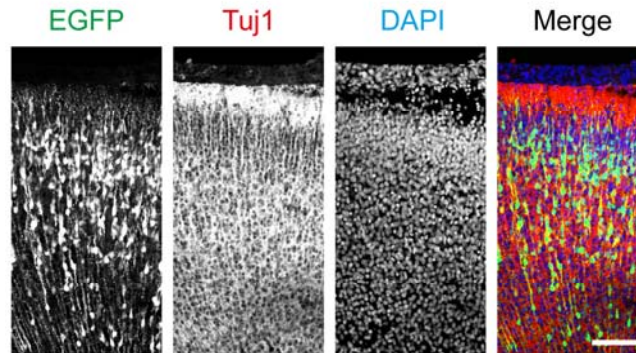

**Figure S11** *Itgb1<sup>ff</sup>* or *Itgb1<sup>f/+</sup>* mice at E15.5 were subject to *in utero* electroporation with pCAG-IRES-GFP plasmid together with pTurbo-Cre. Cortical sections from P3 mice were stained with antibody against neuronal marker Tuj1 and cell layers were marked by DAPI labeling. Scale bar, 100  $\mu\text{m}$ .
